# The evolution of suppressed recombination between sex chromosomes by chromosomal inversions

Colin Olito\* & Jessica K. Abbott

March 23, 2020

Department of Biology, Section for Evolutionary Ecology, Lund University, Lund 223 62, Sweden.

\* Corresponding author e-mail: [colin.olito@gmail.com](mailto:colin.olito@gmail.com)

*Manuscript elements:* Figure 1, Figure 2, Figure 3, Figure 4, Figure 5, Table 1, Table 2.

*Running Title:* Inversions on sex chromosomes

*Keywords:* Sex chromosomes; Recombination; Chromosomal inversions; Sexual antagonism; Evolutionary strata.

## 1 **Abstract**

2 The idea that sex-differences in selection drive the evolution of suppressed recombination between sex  
3 chromosomes is well-developed in population genetics. Yet, despite a now classic body of theory, empirical  
4 evidence that sexual antagonism drives the evolution of recombination suppression remains meagre and  
5 alternative hypotheses underdeveloped. We investigate whether the length of 'evolutionary strata' formed  
6 by chromosomal inversions that expand the non-recombining sex determining region (SDR) on recombin-  
7 ing sex chromosomes can offer an informative signature of whether, and how, selection influenced their  
8 fixation. We develop population genetic models that determine how the length of a chromosomal inver-  
9 sion that expands the SDR affects its fixation probability for three categories of inversions: (i) neutral, (ii)  
10 directly beneficial (i.e., due to breakpoint or position effects), and (iii) indirectly beneficial (especially those  
11 capturing sexually antagonistic loci). Our models predict that neutral inversions should leave behind a  
12 unique signature of large evolutionary strata, and that it will often be difficult or impossible to distinguish  
13 between smaller strata created by directly or indirectly beneficial inversions. An interesting and unex-  
14 pected prediction of our models is that the physical location of the ancestral SDR on the sex chromosomes  
15 is the most important factor influencing the relation between inversion size and the probability of expand-  
16 ing the SDR. Our findings raise a suite of new questions about how physical as well as selective processes  
17 influence the evolution of recombination suppression between sex chromosomes.

## 18 Introduction

19 Two characteristic features of sex chromosomes give them a unique role in evolutionary biology: (i) the  
20 presence of one or more genes providing a mechanism for sex-determination, and (ii) suppressed recom-  
21 bination in the vicinity of the sex-determining loci, possibly extending to entire chromosomes. Recom-  
22 bination suppression is a critical early step in sex chromosome evolution because it enables subsequent  
23 divergence between the X and Y (or Z and W) chromosomes through the accumulation of insertions, dele-  
24 tions, duplications, and rearrangements. In the long term, loss of recombination leads to several familiar  
25 defining features of heteromorphic sex chromosomes such as differences in effective population size be-  
26 tween X-linked, Y-linked, and autosomal genes, hemizygoty, and dosage compensation (Charlesworth  
27 *et al.* 2005; Bergero and Charlesworth 2009; Beukeboom and Perrin 2014).

28 Classic population genetics theory proposes that heteromorphic sex chromosomes evolve from ances-  
29 tral autosomes in several steps: a new sex-determination gene (or linked gene cluster) originates on an  
30 ancestral pair of autosomes, followed by the accumulation of sexually antagonistic variation in linkage  
31 with the sex-determining alleles – with male-beneficial alleles associated with the proto-Y (or proto-Z)  
32 and female-beneficial alleles with the proto-X (or proto-W) chromosomes – resulting in selection for re-  
33 duced recombination between these and the sex-determining gene (Fisher 1931; Nei 1969; Charlesworth  
34 and Charlesworth 1980; Bull 1983; Rice 1987; Lenormand 2003; Charlesworth *et al.* 2005). Sex-differences  
35 in selection, and especially sexually antagonistic selection, is central in this theory. Indeed, sexually  
36 antagonistic selection also plays a key role in theories for the initial evolution of separate sexes from  
37 hermaphroditism by means of genetic sex-determination (Charlesworth and Charlesworth 1978a,b; Bull  
38 1983; Olito and Connallon 2019), sex-chromosome turnovers (van Doorn and Kirkpatrick 2007, 2010; Scott  
39 *et al.* 2018), and even transitions from environmental to genic sex determination (Muralidhar and Veller  
40 2018).

41 Despite this well developed body of theory, empirical evidence that sexual antagonism drives the evo-  
42 lution of recombination suppression between sex chromosomes remains weak. On one hand, influential  
43 sex-limited selection experiments and population genomic analyses of heteromorphic sex chromosomes  
44 demonstrate that sexually antagonistic variation can accumulate on sex chromosomes, apparently sup-  
45 porting the above theory (e.g., Rice 1992; Chippindale *et al.* 2001; Gibson *et al.* 2002; Zhou and Bachtrog  
46 2012; Qiu *et al.* 2013). On the other hand, it is often difficult or impossible to determine whether the ac-  
47 cumulation of sexually antagonistic variation in fact preceded the evolution of suppressed recombination  
48 (Charlesworth and Charlesworth 1980; Rice 1984; Ironside 2010; Ponnikas *et al.* 2018). Recent studies iden-  
49 tifying sexually antagonistic variation within sex-linked regions on established sex chromosomes provide  
50 meagre support for the above theory (e.g., Bergero and Charlesworth 2009; Qiu *et al.* 2013; Kirkpatrick and

51 Guerrero 2014; Wright *et al.* 2017; Bergero *et al.* 2019).

52 However, several other processes besides sexual antagonism have been proposed that could cause  
53 the evolution of suppressed recombination between sex chromosomes, including: (1) genetic drift – e.g.,  
54 neutral or nearly-neutral chromosomal rearrangements or accumulated sequence dissimilarities drifting to  
55 fixation (Charlesworth *et al.* 2005); (2) positive selection – e.g., of a beneficial chromosomal rearrangement  
56 suppressing recombination (Haldane 1957); and (3) meiotic drive – e.g., establishment of a meiotic drive  
57 element in tight linkage with a sex-determining factor (Úbeda *et al.* 2010). Compared to sexual antagonism  
58 these alternative hypotheses are theoretically and empirically underdeveloped (reviewed in Ironside 2010;  
59 Ponnikas *et al.* 2018). If unique genomic signatures could be ascribed to each process empiricists could  
60 discriminate between different models of recombination suppression using genome sequence data.

61 One potentially informative signature to differentiate between different drivers of recombination sup-  
62 pression is the length of ‘evolutionary strata’ (discrete sex-linked regions with different levels of sequence  
63 differentiation). Evolutionary strata can form when the non-recombining sex-determining region (SDR) is  
64 expanded by fixation of inversions inhibiting crossovers between the X and Y (Z and W) chromosomes (or  
65 other large-effect recombination modifiers). They also appear to be relatively common: fixation of multiple  
66 inversions has generated evolutionary strata on both ancient heteromorphic and younger homomorphic  
67 sex chromosomes in both plants and animals (Lahn and Page 1999; Handley *et al.* 2004; Wang *et al.* 2012),  
68 and are becoming increasingly easy to identify from long-read genome sequence data (Wellenreuther and  
69 Bernatchez 2018). Importantly, the length of new inversions is thought to influence both the form and  
70 strength of selection they experience, and therefore their fixation probability (Van Valen and Levins 1968;  
71 Krimbas and Powell 1992). The size of fixed inversions that expand the SDR could therefore shed light on  
72 the evolutionary processes underlying recombination suppression between sex chromosomes.

73 Linking inversion size with fixation probability is difficult, however, particularly for inversions ex-  
74 panding the SDR. The successful establishment of new inversions depends upon the balance of opposing  
75 size-dependent processes: larger inversions are more likely to capture beneficial mutations or combina-  
76 tions of coadapted alleles, but also capture deleterious mutations, which could outweigh any beneficial  
77 effects (Nei *et al.* 1967; Van Valen and Levins 1968; Santos 1986; Cheng and Kirkpatrick 2019). Recently,  
78 Connallon and Olito (2020) extended this theoretical framework to address various selection scenarios for  
79 autosomal inversions. The situation is more complicated for still-recombining sex chromosomes. For ex-  
80 ample, partial linkage between sexually antagonistic loci and the SDR builds stronger associations between  
81 male-beneficial alleles and the Y chromosome, but also reduces the benefit of suppressing recombination  
82 further (Nei 1969; Otto 2019). Another obvious complication is that a new inversion must both span the  
83 SDR and subsequently fix in the population in order for it to expand the non-recombining region and  
84 establish a new evolutionary stratum.

85 Here, we extend the theoretical framework developed by Van Valen and Levins (1968); Santos (1986),  
86 and Connallon and Olito (2020) to determine how the size of a chromosomal inversion suppressing re-  
87 combination between sex-chromosomes affect its fixation probability. Simply put, we ask: does the size  
88 of evolutionary strata caused by chromosomal inversions reflect the evolutionary processes driving their  
89 fixation? We examine three main evolutionary scenarios: (i) genetic drift of neutral inversions, (ii) uncon-  
90 ditionally beneficial inversions (e.g., due to breakpoint effects), and (iii) indirect selection (due to sexually  
91 antagonistic selection, or differing selection during across life-history stages). We do not consider a recent  
92 meiotic drive hypothesis Úbeda *et al.* (2010) even though it involves the evolution of restricted recombina-  
93 tion because it deals with the origination of genetic sex-determination rather than expansion of an existing  
94 SDR. We also do not address ‘sheltering hypotheses’, which propose that recessive deleterious alleles can  
95 be masked as heterozygotes on the heteromorphic sex chromosome (reviewed in Ironside 2010; Ponnikas  
96 *et al.* 2018; Charlesworth 2017) because previous theory indicates this is unlikely to represent a major evo-  
97 lutionary pathway towards suppressed recombination between sex chromosomes (Fisher 1935; Olito *et al.*  
98 2020). We derive probabilities of fixation as a function of inversion size under each idealized scenario,  
99 first ignoring, and then taking into account the effects of deleterious mutations. We then use these fixa-  
100 tion probabilities to illustrate the expected length distribution of fixed inversions for each scenario (after  
101 Van Valen and Levins 1968; Santos 1986).

102 Our theoretical predictions suggest that evolutionary strata formed by the fixation of neutral inver-  
103 sions should be distinctly larger than those fixed under the other selection scenarios. However, except  
104 under certain conditions, it will be difficult to distinguish evolutionary strata formed by the fixation of  
105 inversions under direct or indirect selection (i.e., sexually antagonistic) from their lengths. An interesting  
106 prediction of our models was that the physical location of the SDR on the sex chromosomes is the single  
107 most influential factor determining the relation between inversion size and the probability of expand-  
108 ing the SDR. We conclude by briefly reviewing available data for sex-linked inversions on recombining  
109 sex chromosomes, discussing how our predictions might be used to help distinguish between different  
110 processes potentially driving the evolution of suppressed recombination between sex chromosomes. We  
111 propose a suite of new questions about how the genomic location of the ancestral SDR potentially affects  
112 the process of recombination suppression between sex chromosomes.

## 113 **Models and Results**

### 114 **Key Assumptions**

115 We make several important simplifying assumptions in our models. First, sex is determined geneti-  
116 cally, with a dominant male-determining factor (i.e., an X-Y system with heterozygous males). Our re-

117 sults are equally applicable to female heterogametic Z-W systems if male- and female-specific parameters  
118 are reversed. Second, the gene(s) involved in sex determination are located in a sufficiently small non-  
119 recombining SDR that they can effectively be treated as a single locus. Hence, our models are most  
120 applicable to the early stages of recombination suppression, when the SDR is still small relative to the  
121 chromosome arm on which it resides and the length of inversions expanding it. Outside of the SDR, in  
122 the pseudoautosomal region (PAR), the sex chromosomes still recombine at rate  $r$  per meiosis. For ease  
123 of comparison in our models, we further distinguish two regions within the PAR based on the mode of  
124 inheritance and 'behavior' of genes located therein: (i) the sex-linked PAR (*sl*-PAR) where  $0 \leq r < 1/2$ ;  
125 and (ii) the autosomal PAR (*a*-PAR) PAR where  $r = 1/2$  (see figure 1A). Third, we assume that inversions  
126 are equally likely to occur at any point along the chromosome arm on which the SDR resides. Fourth,  
127 we assume new inversion mutations occur rarely enough that all inverted chromosomes segregating in a  
128 population are descendent copies of a single inversion mutation. The evolutionary fate of a new inversion  
129 is therefore effectively independent of any others (i.e., we assume weak mutation; Gillespie 1991). Fifth,  
130 recombination is completely suppressed between heterokaryotypes, although in reality genetic exchange  
131 may rarely occur via double crossovers or gene conversion (Krimbas and Powell 1992; Korunes and Noor  
132 2019). Finally, we assume that the timescale for fixation of a new inversion is much shorter than that for  
133 the evolution of genetic degeneration and dosage compensation in the chromosomal region spanned by  
134 the inversion. This assumption is justified by the relative rates of fixation for beneficial mutations com-  
135 pared to that for multiple 'clicks' of Muller's ratchet or the fixation of weakly deleterious mutations due  
136 to background selection (see Charlesworth and Charlesworth 2000; Bachtrog 2008).

137 We focus on the evolutionary fate of inversions spanning the SDR on a Y chromosome. As we outline  
138 below, inversions spanning the SDR on an X chromosome may also suppress recombination if they go  
139 to fixation in a population, but inversions on the Y are more likely to do so because they have a smaller  
140 effective population size than X-linked inversions ( $N_Y < N_X$ ), experience selection exclusively in males,  
141 and are more likely to be maintained as balanced polymorphisms. We therefore highlight only essential  
142 differences between model predictions for inversions on the Y and X chromosomes in each evolutionary  
143 scenario. Full details for each model are provided in the Supporting Information, and simulation code is  
144 available at <https://github.com/colin-olito/inversionSize-ProtoSexChrom>.

## 145 **Linking selection to fixation probabilities**

146 Following Van Valen and Levins (1968), Santos (1986), and Connallon and Olito (2020), we define the  
147 length of an inversion,  $x$ , as the proportion of the chromosome arm spanned by the inversion ( $0 < x < 1$ ).  
148 Note, this scale is applicable only to paracentric inversions (those not spanning the centromere), which  
149 appear to be more common than pericentric inversions (Wellenreuther and Bernatchez 2018).

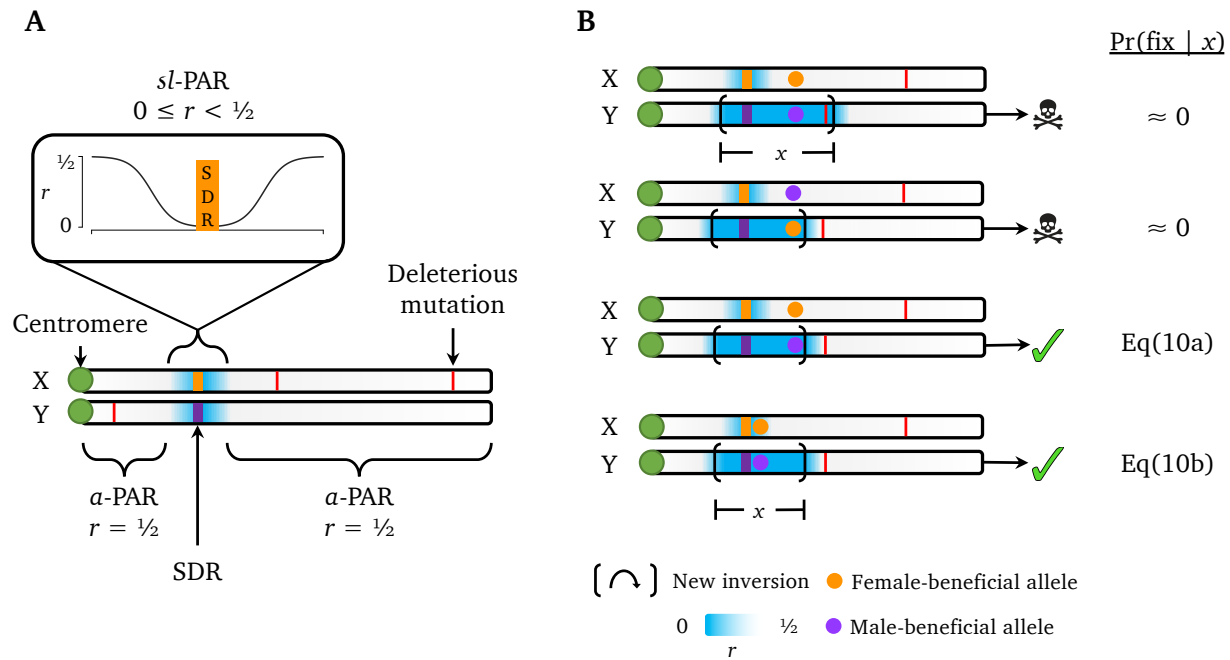

Figure 1: **(A)** Simplified diagram of recombining sex chromosomes in the models illustrating the three main chromosomal regions with distinct evolutionary dynamics: (i) the non-recombining sex-determining region (SDR; orange and purple bars), containing the sex-determining gene(s); (ii) the autosomal-PAR, or  $a\text{-PAR}$ , region, in which there is free recombination between the sex chromosomes ( $r = 0.5$ ; white). Genes located in the  $a\text{-PAR}$  are physically sex-linked, yet exhibit evolutionary dynamics that are identical to autosomal genes because they recombine freely; and (iii) The sex-linked pseudo-autosomal region ( $sl\text{-PAR}$ ), which is physically adjacent to the SDR, and in which the recombination rate between sex chromosomes is  $0 \leq r < 0.5$  (indicated by blue shading). Due to partial linkage with the SDR, genes contained within this region exhibit evolutionary dynamics that are distinct from the other two regions, particularly those with sexually antagonistic effects (reviewed in Otto *et al.* 2011). **(B)** Illustration of new chromosomal inversions capturing the SDR and a single SA locus on the Y chromosome highlighting several key features of the theoretical models, with reference to the fixation probability provided in the main text. From top to bottom, the diagrams illustrate: (i) new inversions capturing a deleterious mutation will not spread, and this is more likely for larger inversions; (ii) a mutation-free inversion on the proto-Y capturing a female-beneficial allele will not spread; (iii – iv) a mutation-free inversion on the proto-Y capturing a male-beneficial allele can spread, and will have a fixation probability equal to Eq(6) if the SA locus is located in the  $a\text{-PAR}$ , and Eq(9) if it is located in the  $sl\text{-PAR}$ . Note that inversions completely suppress recombination between the sex chromosomes ( $r = 0$  inside ‘new inversion’ brackets).



150 New inversions of different lengths will vary systematically in the average number of mutations they  
151 capture when they first arise. The fixation probability of an inversion of length  $x$  will depend both  
152 upon the selection scenario (i.e., scenarios (i) – (iii) above), and the number of deleterious alleles that it  
153 carries when it first arises in the population (represented by  $k$ , where  $0 \leq k$ ). We assume that deleterious  
154 mutations segregate independently at different loci, and are at mutation-selection balance prior to the  
155 origin of a given inversion.

156 Following previous models of inversion evolution (Nei *et al.* 1967; Santos 1986; Connallon *et al.* 2018; see  
157 also Orr and Kim 1998), we assume that new inversions are unlikely to successfully establish unless they  
158 are initially free of deleterious mutations. Moreover, for a new inversion to expand the non-recombining  
159 SDR region, it must span the ancestral SDR. Specifically, the ancestral SDR must fall between the two  
160 breakpoints of the new inversion. We can therefore express the overall fixation probability of an inversion  
161 of length  $x$  as

$$\Pr(\text{fix} \mid x) = \Pr(\text{fix} \mid x, k = 0) \cdot \Pr(k = 0 \mid x) \cdot \Pr(\text{SDR} \mid x), \quad (1)$$

162 where  $\Pr(k = 0 \mid x) = \exp\left[\frac{-U_d x}{s_d}\right]$  is the probability that the inversion is initially free of deleterious  
163 mutations (e.g. Nei *et al.* 1967; Orr and Kim 1998),  $\Pr(\text{fix} \mid x, k = 0)$  is the probability that the inversion fixes  
164 in the population given that it is initially mutation-free,  $\Pr(\text{SDR} \mid x)$  is the probability that the inversion  
165 spans the ancestral SDR,  $s_d$  is the heterozygous fitness effect of each deleterious allele an individual  
166 inherits, and  $U_d$  is the deleterious mutation rate for the chromosome arm on which the SDR resides.  
167 The overall effect of deleterious genetic mutations (i.e., the terms  $\Pr(\text{fix} \mid x, k = 0)$  and  $\Pr(k = 0 \mid x)$ )  
168 is time-dependent. Deleterious mutation-free inversions will initially be favoured relative to wild-type  
169 chromosomes, which will, on average, carry some deleterious alleles (Nei *et al.* 1967; Ohta and Kimura 1968;  
170 Kimura and Ohta 1970). However, this selective advantage will decay over time, eventually equalizing the  
171 relative fitnesses of wild-type and inversion-bearing Y chromosomes, as loci captured by the inversion  
172 approach equilibrium under mutation-selection balance (Nei *et al.* 1967).

173 To illustrate the link between selection and the fixation probability, we first present results that condi-  
174 tion on the inversions spanning the SDR (i.e., we temporarily assume  $\Pr(\text{SDR} \mid x) = 1$ ). For each scenario,  
175 we derive simple expressions for  $\Pr(\text{fix} \mid x)$  in the absence of deleterious mutational variation (i.e., setting  
176  $U_d = 0$ ). We then use a time-dependent branching process approximation to derive an expression for the  
177 fixation probability  $\Pr(\text{fix} \mid x)$ , which takes into account the effects of segregating deleterious mutations  
178 (i.e.,  $\Pr(\text{fix} \mid x, k = 0)$  and  $\Pr(k = 0 \mid x)$ ). Finally, we relax the assumption that new inversions span the  
179 SDR by defining simple expressions for  $\Pr(\text{SDR} \mid x)$ , and then illustrate the interaction between inversion  
180 size and the location of the SDR on the fixation probability of inversions expanding the SDR.



## 181 **Wright-Fisher Simulations**

182 To validate our analytic results, we ran complementary stochastic Wright-Fisher simulations in R (R Core  
183 Team 2018). In each replicate simulation, a single-copy deleterious mutation-free inversion was intro-  
184 duced into a population with  $N$  individuals initially at deterministic mutation-selection equilibrium. In  
185 the absence of epistasis and linkage disequilibrium between deleterious mutations (as we have assumed  
186 throughout) the average fitness of wild type chromosomes is  $e^{-2U_d}$ , the standard multilocus deleterious  
187 mutation load (Haldane 1937; Agrawal and Whitlock 2012). We used deterministic allele frequency recur-  
188 sions to predict the per-generation change in frequency of the inversion, with time-dependent selection  
189 modeled after Nei *et al.* (1967). Realized frequencies in each generation were calculated by multinomial  
190 sampling using the predicted deterministic genotype frequencies to determine the probability of sam-  
191 pling a given genotype. Simulation computer code is provided in the Supplementary Material, and is  
192 freely available at <https://github.com/colin-olito/inversionSize-ProtoSexChrom>.

## 193 **Neutral inversions**

194 The fixation probability of neutral inversions expanding the SDR on recombining sex chromosomes is  
195 very similar to that of autosomal inversions (Connallon and Olito 2020), but must take into account the  
196 appropriate effective population size. For an inversion spanning the SDR on the Y chromosome in a  
197 population with an equal sex ratio, the effective population size is  $N_Y = N_m = N/2$ , where  $N_m$  is the  
198 number of breeding males in the population and  $N$  is the total breeding population size. In the absence  
199 of deleterious mutations the fixation probability for a neutral inversion is equal to the initial frequency  
200 of the inversion:  $\text{Pr}(\text{fix}) = 1/N_Y = 2/N$  for a single copy inversion mutation (Kimura 1962; Crow and  
201 Kimura 1970). Under the same assumptions, inversions spanning the SDR on the X chromosome will have  
202 an effective population size of  $N_X = 3N_f/2 = 3N/4$ , and  $\text{Pr}(\text{fix}) = 1/N_X = 4/3N$ .

203 Under deleterious mutation pressure, the evolutionary fate of neutral inversions is analogous to ben-  
204 efiticial alleles under time-dependent selection. Unfortunately, there is no simple analytic solution for the  
205 fixation probability under this scenario (Ohta and Kojima 1968; Kimura and Ohta 1970; Uecker and Her-  
206 misson 2011; Waxman 2011). However, it is possible to approximate the fixation probability for large pop-  
207 ulations under weak selection (Connallon and Olito 2020). In large populations ( $0 < N_Y^{-1}, N_X^{-1} \ll 1$ ) an  
208 initially deleterious mutation-free inversion will have an initial fitness advantage over non-inverted chro-  
209 mosomes, and will increase in frequency pseudo-deterministically until new deleterious mutations arise  
210 on descendent copies of the original inversion and reach equilibrium under mutation-selection balance. At  
211 this point, the inversion and wild-type karyotype will be equally fit and the inversion will subsequently  
212 evolve neutrally. The approximate fixation probability for an initially mutation-free inversion spanning  
213 the SDR is

$$\Pr(\text{fix} \mid x, k = 0) \approx N_Y^{-1} \exp \left[ U_d x \left( \frac{1}{1 - e^{-s_d}} - \frac{2}{s_d} \right) \right] e^{\frac{-U_d x}{s_d}} \approx N_Y^{-1}, \quad (2a)$$

when the inversion is on the Y chromosome, and

$$\Pr(\text{fix} \mid x, k = 0) \approx N_X^{-1} e^{\frac{U_d x}{s_d}} e^{\frac{-U_d x}{s_d}} = N_X^{-1}, \quad (2b)$$

214 when the inversion is on the X chromosome (see Appendix A). Eq(2a) and Eq(2b) reduce to the same form  
 215 as the autosomal case (see Nei *et al.* 1967; Connallon and Olito 2020) due to our assumption that inversion  
 216 fixation occurs on a shorter timescale than gene degeneration and loss within the inverted chromosomal  
 217 segment (see Assumptions). When functional homologs exist on the X and Y chromosomes, the dynamics  
 218 of deleterious mutations prior to the inversion, and the subsequent evolution of initially mutation-free  
 219 neutral inversions, are nearly identical whether the inversion arises on an Y, X, or autosome Connallon  
 220 and Olito (2020). This deceptively simple result emerges from the rather complicated time-dependent  
 221 dynamics because the greater fitness advantage to larger inversions of being initially free of deleterious  
 222 mutations is approximately counterbalanced by the dwindling chance that they will in fact be initially free  
 223 of deleterious alleles.

224 *Key result: When inversions restricting recombination between sex chromosomes are selectively neutral, the overall*  
 225 *fixation probability after taking deleterious mutations into account is equal to the initial frequency of the inversion*  
 226 *(Fig. 2A).*

## 227 **Unconditionally beneficial inversions**

228 The specific location of new inversion breakpoints may give inverted chromosomes a selective advantage  
 229 over wild-type chromosomes. For example, an inversion may bring a protein coding sequence into closer  
 230 proximity to a promoter region, thereby improving transcription efficiency without disrupting other genes  
 231 (Krimbas and Powell 1992). Under weak selection, and momentarily neglecting deleterious mutations, the  
 232 fixation probability of a beneficial inversion can be approximated by  $\Pr(\text{fix}) \approx 2s_I$  (Haldane 1927) (i.e.,  
 233 there is no relation between the length of the inversion and the fixation probability). For beneficial inver-  
 234 sions capturing the SDR on a Y chromosome,  $s_I = hs_I^m$  represents the heterozygous selective advantage  
 235 of the inversion in males (where  $h$  is the dominance coefficient associated with the inversion). For a new  
 236 inversion capturing the SDR on an X-chromosome

$$s_I \approx \frac{h(s_I^f + s_I^m)}{2}, \quad (3)$$

237 where  $s_I^{\text{sex}}$  is the sex-specific selection coefficient ( $\text{sex} \in \{m, f\}$ ). Both approximations work well when  
 238  $1/N \ll s_I \ll 1$ .

239 Taking deleterious mutations into account is mathematically similar to the haploid autosomal case  
240 (see Eqs.[9 & 10] in Connallon and Olito 2020, and our Appendix A). A new beneficial inversion that is  
241 also free of deleterious mutations will have a temporarily heightened selective advantage. Specifically,  
242 the relative fitness of the inversion chromosome will decline over time from  $(1 + s_I)e^{U_d x}$  to  $(1 + s_I)$  as  
243 it accumulates deleterious mutations (Nei *et al.* 1967). That is, the advantages of being mutation-free  
244 and intrinsically beneficial are both present initially, but the advantage of being mutation-free decays  
245 and eventually disappears, leaving only the intrinsic advantage. The resulting fixation probability can  
246 be approximated using a time-dependent branching process (Peischl and Kirkpatrick 2012; Kirkpatrick  
247 and Peischl 2013), which can be expressed in terms of a time-averaged *effective selection coefficient* for the  
248 inversion:

$$s_e = s_t \sum_{t=0}^{\infty} (1 - s_I)^t = s_I \left[ 1 + \frac{U_d x}{1 - (1 - s_I)e^{-s_d}} \right], \quad (4)$$

249 where  $s_I = s_I^m$  for inversions capturing the SDR on the Y chromosome, while  $s_I$  is given by Eq.(3) for those  
250 on the X-chromosome. Incorporating the probability that the inversion is initially mutation free, we have

$$\Pr(\text{fix} \mid x, k = 0) \approx 2s_I \left[ 1 + \frac{U_d x}{1 - (1 - s_I)e^{-s_d}} \right] e^{-\frac{U_d x}{s_d}}, \quad (5)$$

251 and  $s_I$  is defined as above for Y- and X-linked inversions respectively. The overall effect of deleterious  
252 mutations is to make the fixation probability decline with inversion length, with a maximum of  $\approx 2s_I$  as  $x$   
253 approaches 0 (Fig. 2B).

254 *Key result: When inversions spanning the SDR are intrinsically beneficial, smaller inversions are always favoured*  
255 *because they are less likely to capture deleterious mutations.*

## 256 Indirect selection – Sexual antagonism

257 It is well established that sexually antagonistic (SA) variation can theoretically drive selection for recom-  
258 bination modifiers coupling selected alleles with specific sex chromosomes (e.g. Fisher 1931; Nei 1969;  
259 Charlesworth and Charlesworth 1978a, 1980; Bull 1983; Lenormand 2003; Otto 2019). However, the role  
260 of pre-existing linkage disequilibrium between the SDR and SA loci in this process is complicated. The  
261 idea that SA polymorphisms initially linked to the SDR can promote the accumulation of more linked  
262 SA polymorphisms, and lead to stronger selection for recombination suppression is seductively intuitive  
263 (Rice 1984, 1996; Charlesworth 2017; Otto 2019). Yet, the conditions for the spread of SA polymorphisms  
264 to multiple loci in linkage disequilibrium with the SDR are in fact quite restrictive (Otto 2019). When  
265 recombination is suppressed by an inversion, the scenario is more complicated still because multiple SA  
266 loci that may or may not be initially linked with the SDR can contribute to its overall fitness effect. The

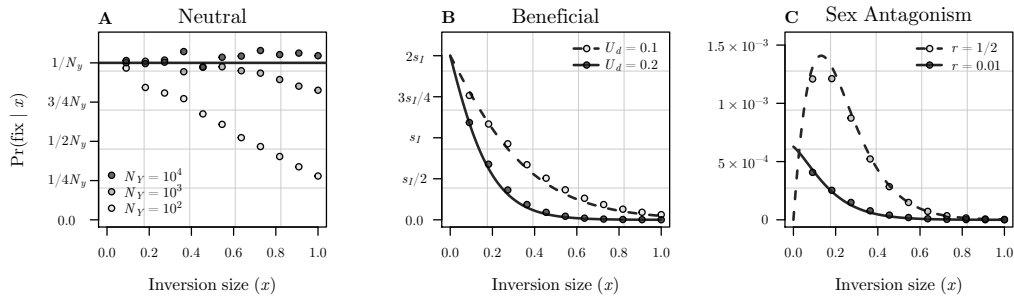

Figure 2: Fixation probability for inversions of different lengths capturing the SDR on the Y-chromosome under: (A) Neutral inversions; (B) Unconditionally beneficial inversions; and (C) Sexually antagonistic selection. Lines show analytic approximations of  $\Pr(\text{fix} | x)$  (Eq(2), Eq(5), and Eq(10)a in panels A, B, and C respectively), points show results for corresponding Wright-Fisher simulations. Note that analytic approximations for all three effective populations sizes overlap in panel A. Results are shown for the following parameter values: (A)  $U_d = 0.2$  and  $s_d = 0.02$ ; (B)  $s_I = 0.02$ ,  $s_d = 0.02$ ; (C)  $s_f = s_m = 0.05$ ,  $U_d = 0.1$ ,  $s_d = 0.01$ ,  $A = 1$ ,  $P = 0.05$ . All results condition on the inversion spanning the SDR.

267 ancestral recombination rate will influence both the fixation probability by altering the equilibrium fre-  
268 quency of female- and male-beneficial alleles at captured SA loci, and the selective advantage of reducing  
269 recombination further.

270 We start with a simplified scenario to begin disentangling the effects of linkage on the fixation proba-  
271 bility of new inversions. Suppose the average number of SA loci on the sex chromosomes is equal to  $A$ ,  
272 that they are uniformly distributed along the chromosomes, are biallelic with standard SA fitness expres-  
273 sions *sensu* Kidwell *et al.* (1977) (each allele is beneficial when expressed in one sex, but deleterious when  
274 expressed in the other; see Table 2), and are initially at equilibrium. Under our assumption that inversion  
275 breakpoints are randomly distributed along the chromosome arm, the number of SA loci spanned by a  
276 new inversion,  $n$ , is a Poisson distributed random variable with mean and variance  $xA$ . For now, we  
277 assume that  $A$  is sufficiently small to ignore the possibility that  $n$  is greater than about 1 (the approxi-  
278 mation breaks down when  $A > 1$ ; we consider the case with multiple SA loci below). We focus on two  
279 idealized scenarios: the SDR and SA locus (1) recombine freely at a rate  $r = 1/2$  per meiosis (i.e., the SA  
280 locus is located in the *a*-PAR); and (2) the SDR and SA locus are partially linked, and recombine at a rate  
281  $0 \leq r < 1/2$  (i.e., the SA locus is located in the *sl*-PAR).

282 **Effect of linkage between the SDR and SA locus** – Considering, for the moment, inversions that already  
283 span the SDR, the fixation probability for a new inversion of size  $x$  that also spans a single unlinked SA  
284 locus on the Y chromosome is the product of three probabilities: (1) that the inversion captures the SA  
285 locus,  $\Pr(n = 1) = xAe^{-xA}$ ; (2) that it captures a male-beneficial allele at the SA locus,  $\Pr(\text{male ben.}) = \hat{q}$ ,  
286 where  $\hat{q}$  is the equilibrium frequency of the male-beneficial allele; and (3) that it escapes stochastic loss  
287 due to genetic drift and fixes in the population,  $\Pr(\text{fix}) \approx 2s_I$  Haldane (1927). We can approximate the  
288 expected rate of increase of a rare inversion as  $s_I \approx (\lambda_I - 1)$ , where  $\lambda_I$  is the eigenvalue associated with  
289 invasion of the rare inversion into a population initially at equilibrium in a deterministic two-locus model  
290 involving the SDR and SA locus ( $\lambda_I$  is also the leading eigenvalue under these conditions). When the SA  
291 locus is unlinked with the SDR ( $r = 1/2$ ), the selection coefficient for the rare inversion is

$$s_I \approx s_m(1 - \hat{q})(1 - \hat{q} - h_m(1 - 2\hat{q})) + O(s_m^2), \quad (6)$$

292 where  $s_m$  is the selection coefficient of the male-deleterious/female-beneficial allele in males. With additive  
293 SA fitness ( $h_f = h_m = 1/2$ ), the fixation probability reduces to

$$\Pr(\text{fix} \mid x, n = 1) = s_m \hat{q}(1 - \hat{q}) x A e^{-xA}. \quad (7)$$

294 When  $A \leq 1$ , Eq(7) is a convex increasing function of inversion size over  $0 < x \leq 1$ , with a maximum  
295 at  $\tilde{x} = 1/A$ , implying that larger inversions are always favoured (recall that  $A < 1$ ). Intuitively, larger  
296 inversions are more likely to capture rare SA loci distributed uniformly along the chromosome arm.

297 How does linkage between the SDR and SA locus alter the fixation probability? We now make two  
 298 additional simplifying assumptions: the SA locus falls within the *sl*-PAR, which makes up a fraction,  $P$ ,  
 299 of the total chromosome arm length, and that  $P \ll x$ . Hence, any inversion that spans the SDR will also  
 300 span the *sl*-PAR. The probability of spanning the SA locus is now  $\Pr(n = 1) = APe^{-AP}$ . Relaxing this  
 301 strong assumption results in predictions that are intermediate with the unlinked scenario Supplementary  
 302 Material. We can approximate  $s_I \approx (\lambda_I - 1)$  from the deterministic two-locus model as before, but the  
 303 expression now involves the equilibrium frequency of the male-beneficial allele on Y chromosomes ( $\hat{Y}$ )  
 304 and X chromosomes in females ( $\hat{X}_f$ ) before the inversion occurs:

$$s_I \approx \frac{s_m(1 - \hat{Y})(1 - \hat{X}_f - h_m(1 - 2\hat{X}_f))}{1 - s_m(1 - \hat{X}_f - \hat{Y}(1 - h_m - \hat{X}_f) + h_m\hat{X}_f(1 - 2\hat{Y}))}. \quad (8)$$

305 When expressed in terms of the equilibrium allele frequencies on the three chromosome types, the an-  
 306 cestral recombination rate ( $r$ ) drops out of Eq(8). Prior linkage between the SDR and SA loci influences  
 307 the strength of indirect selection for the inversion by altering the equilibrium frequencies of the male-  
 308 beneficial allele on Y chromosomes, and X chromosomes in females. Interestingly, the effect of  $r$  on the  
 309 overall selection coefficient for the inversion can take different forms, depending on the relative strength  
 310 of selection on the SA alleles in males and females Fig(3). In this way, the SA selection coefficients can  
 311 influence whether inversions capturing loosely linked (e.g., located in the *a*-PAR) or tightly linked (e.g.,  
 312 located physically close to the SDR in the *sl*-PAR) are more strongly favoured.

313 Under additive SA selection ( $h_f = h_m = 1/2$ ), the fixation probability simplifies to

$$\Pr(\text{fix} \mid x, n = 1, \text{sl-PAR}) = \frac{2s_m\hat{Y}(1 - \hat{Y})APe^{-AP}}{2 - s_m(2 - \hat{X}_f - \hat{Y})}, \quad (9)$$

314 which is independent of  $x$ .

315 *Key result: The overall effect of genetic linkage between the SDR and SA locus is to shift the fixation probability*  
 316 *towards smaller inversions. This is because large inversions no longer have an increased probability of spanning an*  
 317 *SA locus. In the limiting case where  $P \ll x$ , the fixation probability is independent of inversion size. Relaxing this*  
 318 *assumption weakens the effect of linkage. Sex-biases in the SA selection coefficients can alter how tightly linked the*  
 319 *SDR and SA locus must be to maximize the fixation probability.*

320 **Effect of deleterious mutations** – Once an inversion capturing the SDR and a male-beneficial allele  
 321 at the SA locus successfully establishes, it will behave much like an unconditionally beneficial inversion,  
 322 and the effects of deleterious mutations can be taken into account as in Eq(5). Under weak selection and

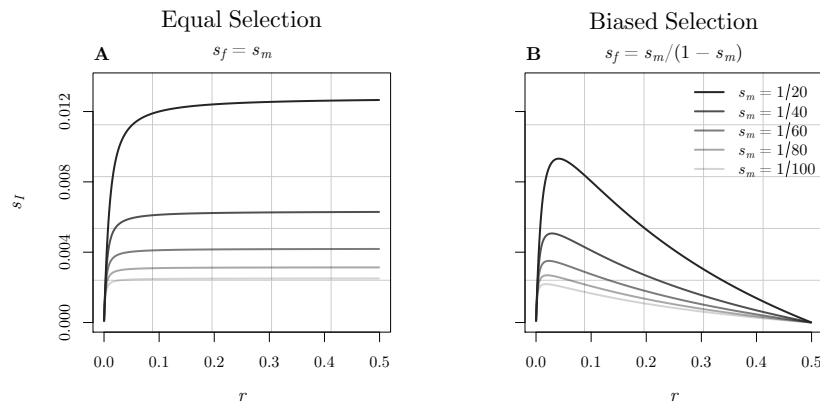

Figure 3: Overall selection coefficient ( $s_I$ ) for an inversion linking the SDR and a male-beneficial allele at a SA locus within the *sl*-PAR (as defined by Eq[8]) as a function of the ancestral recombination rate between the two loci ( $r$ ). Panel A shows  $s_I$  when there is equal selection on female- and male-beneficial alleles ( $s_f = s_m$ ) and additive SA fitness effects ( $h_f = h_m = 1/2$ ). Panel B shows the same for female biased selection ( $s_f < s_m$ ; recall from table 2 that SA selection coefficients represent the decrease in relative fitness of either SA allele in males and females); specifically, for the special case where  $s_f$  is equal to the single-locus invasion condition for the male-beneficial allele ( $s_f = s_m / (1 - s_m)$ ).



323 additive SA fitness, the overall fixation probability for an inversion spanning the SDR and an SA locus  
 324 falling within the *a*-PAR or *sl*-PAR will be

$$\Pr(\text{fix} \mid x, a\text{-PAR}, k = 0) \approx 2s_I x A e^{-xA} \left[ 1 + \frac{U_d x}{1 - (1 - s_I) e^{-s_d}} \right] e^{-\frac{U_d x}{s_d}} \quad (10a)$$

and

$$\Pr(\text{fix} \mid x, sl\text{-PAR}) \approx 2s_I A P e^{-AP} \left[ 1 + \frac{U_d x}{1 - (1 - s_I) e^{-s_d}} \right] e^{-\frac{U_d x}{s_d}} \quad (10b)$$

325 respectively. Intermediately sized inversions have the greatest fixation probability when the SA locus is  
 326 initially unlinked with the SDR, but smaller inversions are always favoured when the SA locus falls within  
 327 the *sl*-PAR (figure 2C).

328 *Key result: When the SA locus is initially unlinked with the SDR, intermediately sized inversions have the highest*  
 329 *fixation probability because they balance the countervailing effects of inversion size on the likelihood of successfully*  
 330 *capturing the SDR and SA loci (larger is better), and minimizing the chance of capturing deleterious mutations*  
 331 *(smaller is better). When the SA locus falls within the sl-PAR, inversion size no longer influences the probability of*  
 332 *capturing the SA locus, but smaller inversions still minimize the chance of capturing deleterious mutations, and so*  
 333 *they are always favoured.*

334 **Multiple SA loci** – When inversions can span more than one SA locus (i.e., when  $A > 1$ ), the effect  
 335 of prior linkage between the SDR and SA loci on the fixation probability will depend on the size of the  
 336 *sl*-PAR, and satisfying analytic approximations become elusive. However, under our stated assumption  
 337 that the *sl*-PAR is small ( $P \ll x$ ), the effect of linkage will generally weaken because SA loci distributed  
 338 randomly along the chromosome arm are more likely to fall within the *a*-PAR. Analogous to previous  
 339 models of inversions capturing locally adaptive alleles (Kirkpatrick and Barton 2003; Connallon *et al.*  
 340 2018), a new Y-linked inversion may capture male-beneficial alleles at a subset  $M$  of the  $n$  SA loci it spans,  
 341 where  $M \sim \text{Bin}(n \mid \bar{q})$ , and  $\bar{q}$  is the average equilibrium frequency of male beneficial alleles across the  $n$   
 342 loci. With no epistasis, weak selection, and loose linkage among SA loci, the fixation probability of new  
 343 inversions is

$$\Pr(\text{fix} \mid x) = \Pr(\text{fix} \mid n) \Pr(n \mid x) \approx 2s_I e^{-xA} \frac{(xA)^n}{n!}, \quad (11)$$

344 where

$$s_I \approx \sum_{i \in n} s_{m,i} (1 - \hat{q}_i) (1 - \hat{q}_i - h_{m,i} (1 - 2\hat{q}_i)) - \sum_{i \in (n-M)} s_{m,i} (1 - \hat{q}_i - h_{m,i} (1 - 2\hat{q}_i)) + O(s_{i,m}^2), \quad (12)$$

345 and 0 for  $s_I < 0$ . More detailed assumptions are necessary to model the possibility of linkage between the  
 346 SDR and a subset of captured SA loci (e.g., a quantitative description of the recombination rate within the  
 347 *sl*-PAR). However, when selection is weak and SA loci are not tightly linked with the SDR, higher-order  
 348 linkage effects between SA loci within the *sl*-PAR can be ignored (Otto 2019). In this case, the fixation  
 349 probability is well approximated by substituting

$$s_I \approx \sum_{i \in (n-L)} s_{m,i}(1 - \hat{q}_i)(1 - \hat{q}_i - h_{m,i}(1 - 2\hat{q}_i)) + \sum_{i \in L} s_{m,i}(1 - \hat{Y})(1 - \hat{X}_{f,i} - h_{m,i}(1 - 2\hat{X}_{f,i})) - \quad (13)$$

$$\sum_{i \in (n-L-M)} s_{m,i}(1 - \hat{q}_i - h_{m,i}(1 - 2\hat{q}_i)) + \sum_{i \in (L-M)} (1 - \hat{X}_{f,i} - h_{m,i}(1 - 2\hat{X}_{f,i})),$$

350 into Eq(11), where  $L$  denotes the set of SA loci falling within the *sl*-PAR ( $E[L] = AP$ ). With deleterious  
 351 mutations, the multilocus fixation probability becomes

$$\Pr(\text{fix} \mid x, k = 0) \approx 2s_I e^{-xA} \frac{(xA)^n}{n!} \left[ 1 + \frac{U_d x}{1 - (1 - s_I)e^{-s_d}} \right] e^{-\frac{U_d x}{s_d}}. \quad (14)$$

352 where  $s_I$  is defined as in Eq(12) and Eq(13).

353 *Key result: The effect of prior linkage between the SDR and SA loci on the fixation probability of different sized*  
 354 *inversions will generally weaken when multiple SA loci are distributed along the sex chromosomes. However, this*  
 355 *effect will ultimately depend on the size of the *sl*-PAR, which is assumed to be small in our models.*

356 **Inversions on the X** – Results for inversions on X chromosomes can be derived by similar steps. How-  
 357 ever, because they are exposed to selection in both males and females, X-linked inversions can invade over  
 358 a smaller fraction of parameter space than Y-linked inversions, and are generally maintained as balanced  
 359 polymorphisms when they do (Figure. 4).

360 *Key result: X-linked inversions may contribute to reduced recombination between sex chromosomes as segregating*  
 361 *polymorphisms, but are far less likely to cause permanent recombination suppression than Y-linked inversion.*

### 362 Indirect selection – Haploid & diploid selection

363 We have so far considered selection in the diploid phase only. However, sexually reproducing eukaryotes  
 364 have alternating life-cycles with a reduced (e.g., haploid) and doubled (e.g., diploid) phase (Strasburger  
 365 1894; Roe 1975). Moreover, haploid selection can play an important role in maintaining genetic poly-  
 366 morphisms (Immler *et al.* 2011), as well as facilitating sex chromosome turnovers (Scott *et al.* 2018) and

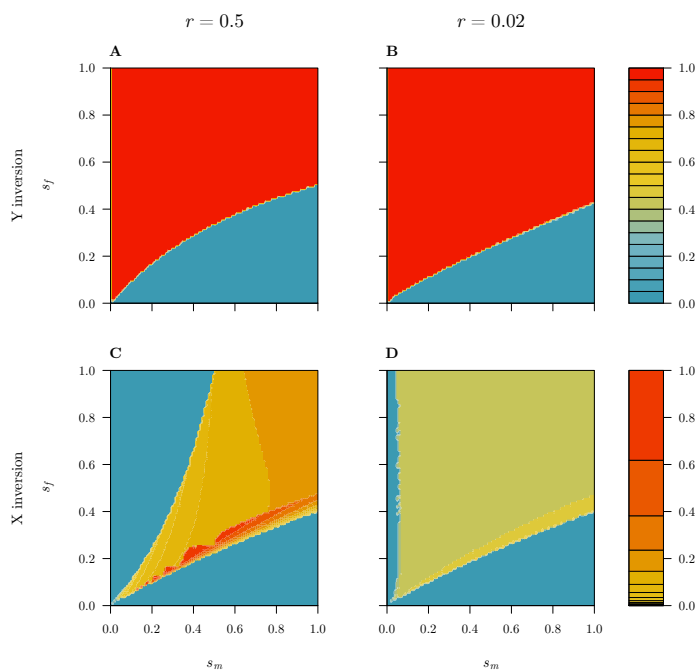

Figure 4: Equilibrium frequency of new inversions capturing the SDR and a single sexually antagonistic locus on the Y (panels A and B) and the X chromosomes (panels C and D), under loose (panels A and C) and tight (panels B and D) linkage between the two loci, and additive SA fitness effects ( $h_f = h_m = 1/2$ ). Initial equilibrium genotypic frequencies were calculated by iterating the 2-locus deterministic recursions in the absence of an inversion. Once this initial equilibrium was reached, an (heterozygote) inversion genotype was introduced at low frequency ( $10^{-6}$ ), and the recursions were again iterated until all genotypic frequencies remained unchanged. Note the different color scale for Y and X inversions. Recursions are presented in the Supplementary Materials.

367 transitions between sex determination systems (Muralidhar and Veller 2018). The models summarized  
 368 above for sexually antagonistic selection can be easily extended to incorporate haploid selection, although  
 369 this opens up many new possible selection scenarios (Immler *et al.* 2011; Scott *et al.* 2018). For simplicity  
 370 and brevity, we briefly consider a general model of haploid and diploid selection, and illustrate the model  
 371 predictions with a single representative case of ploidy antagonistic selection. The critical difference  
 372 between this model and those of SA selection above with respect to the fixation probability of differently  
 373 sized inversions is that  $s_I$  is now a function of both haploid and diploid fitnesses.

374 Consider the simple case of a rare inversion capturing the SDR and a single selected locus on the Y  
 375 chromosome. To keep the model general, and relatively simple, we retain arbitrary fitness expressions for  
 376 the haploid ( $v_1^f, v_2^f$  for female, and  $v_1^m, v_2^m$  for male gametes, respectively) and diploid genotypes ( $w_{11}^f, w_{12}^f,$   
 377  $w_{22}^f$  in females, and  $w_{11}^m, w_{12}^m, w_{22}^m$  in males). For Y-linked inversions capturing a single selected locus, the  
 378 approximate selection coefficient for the rare inversion under arbitrary linkage ( $0 \leq r \leq 1/2$ ) is:

$$s_I \approx \frac{(v_2^f \hat{X}_f (v_2^m w_{22}^m - v_1^m w_{12}^m) - v_1^f (1 - \hat{X}_f) (v_1^m w_{11}^m - v_2^m w_{12}^m)) (1 - \hat{Y})}{v_1^f (1 - \hat{X}_f) (v_1^m w_{11}^m (1 - \hat{Y}) + v_2^m w_{12}^m \hat{Y}) + v_2^f \hat{X}_f (v_2^m w_{22}^m \hat{Y} + v_1^m (w_{12}^m - w_{12}^m \hat{Y}))}, \quad (15)$$

379 where  $\hat{Y}$  and  $\hat{X}_f$  represent the frequency of the 2<sup>nd</sup> allele at the selected locus in Y chromosomes and X  
 380 chromosomes in females when the inversion originates. For a rare inversion to invade,  $s_I > 0$  must be  
 381 satisfied for Eq(15), which requires that the net fitness effect of the inversion across haploid and diploid  
 382 phases is male-beneficial, or there is sufficient linkage disequilibrium to offset a female-bias in selection.  
 383 For example, under weak ploidy antagonistic selection with additive fitness in the diploid phase (see  
 384 Table. 2), an inversion capturing the SDR and the 2<sup>nd</sup> allele at the selected locus can invade when  $s >$   
 385  $2t + O(s^2, t^2)$ .

386 Calculation of the fixation probability, and the effects of deleterious mutations are the same as for  
 387 the sexually antagonistic model described above, and result in qualitatively similar predictions. Selection,  
 388 whether during the haploid, diploid, or both phases, influences the fixation probability of differently sized  
 389 inversions similarly, and should favour small to intermediately sized inversions.

390 For X-linked inversions, the addition of selection during the haploid phase expands the conditions  
 391 under which an inversion can be maintained as a balanced polymorphism. The overall result parallels  
 392 that for sexually antagonistic selection: while X-linked inversions can contribute to reduced recombination  
 393 between sex chromosomes, they are far less likely to fix and thereby form evolutionary strata than Y-linked  
 394 inversions.

395 *Key result: The fixation probability of different sized inversions is a similar function for selection occurring during*  
 396 *the haploid, diploid, or both phases. Inversion length will therefore provide little insight into when during the life*  
 397 *cycle indirect selection for suppressed recombination occurs.*

### 398 Probability of expanding the SDR

399 So far, we have presented results that are conditioned on inversions spanning the SDR to clarify the relation  
400 between selection and inversion size for each scenario (i.e., we have assumed  $\Pr(\text{SDR} | x) = 1$ ). Under  
401 this assumption, the models suggest that the length of fixed inversions expanding the SDR will reflect the  
402 selective process underlying their fixation: neutral, directly beneficial, and indirectly beneficial inversions  
403 will leave distinct footprints of different sized evolutionary strata. We now relax this assumption and  
404 examine the effects of explicitly modeling the probability that new inversions span the ancestral SDR.

405 Assuming, as we have throughout, that inversions are equally likely occur at any point along the  
406 chromosome arm on which the SDR resides, the probability that a given inversion will span the SDR  
407 depends on two factors: the length of the inversion ( $x$ ) and the location of the SDR on the chromosome  
408 arm in question (denoted  $\text{SDR}_{\text{loc}}$ ). The total length of the chromosome arm can be subdivided into three  
409 regions: from the centromere and the SDR ( $y_1$ ), the SDR itself ( $y_2$ ), and from the SDR to the telomere  
410 ( $y_3$ ), where  $y_1 + y_2 + y_3 = 1$ . If the SDR is small relative to the length of new inversions (as we have also  
411 assumed),  $y_2 \approx 0$  and  $y_1 + y_3 \approx 1$ . From these assumptions, the probability that a new inversion of length  
412  $x$  spans the SDR is a piecewise function of  $x$  which follows

$$\Pr(\text{SDR} | x) = \begin{cases} x/(1-x) & \text{for } x \leq y_1, y_3 \\ y_1/(1-x) & \text{for } y_1 < x < y_3 \\ y_3/(1-x) & \text{for } y_1 > x > y_3 \\ 1 & \text{for } x > y_1, y_3 \end{cases} \quad (16)$$

413 where  $y_1 = \text{SDR}_{\text{loc}}$  and  $y_3 = (1 - \text{SDR}_{\text{loc}})$ . The form of Eq(16) depends upon  $\text{SDR}_{\text{loc}}$ .

414 Taking into account the probability that a new inversion spans the SDR by substituting Eq(16) into  
415 Eq(1) has an immediate and strong effect on our model predictions. For simplicity, we examine the  
416 fixation probability of new inversions in each selection scenario under two limiting cases for  $\Pr(\text{SDR} | x)$ :  
417 (1) the SDR is located exactly in the middle of the chromosome arm ( $\text{SDR}_{\text{loc}} = 1/2$ ), and (2) the SDR is  
418 located near either the centromere or telomere ( $\text{SDR}_{\text{loc}} = 1/10$ ; results are identical if  $\text{SDR}_{\text{loc}} = 9/10$ ).  
419 Intermediate values of  $\text{SDR}_{\text{loc}}$  yield predictions that fall between these extremes.

420 The effect of  $\Pr(\text{SDR} | x)$  on the relation between inversion size and the probability of expanding the  
421 SDR is most dramatic for neutral inversions (Fig. 5A,D). When the SDR is located in the middle of the  
422 chromosome arm ( $\text{SDR}_{\text{loc}} = 1/2$ ) the probability of expanding the SDR increases until  $x = 1/2$ , after  
423 which it plateaus at  $1/N_Y$  (figure 5A). Intuitively, the probability that a new inversion spans the SDR  
424 increases until  $x > 1/2$ , above which any inversion will necessarily span the SDR. A similar, but more  
425 exaggerated pattern favouring large inversions emerges when the SDR is located near one end of the  
426 chromosome arm (figure 5D). The prediction that larger inversions are always more likely to expand the

427 SDR is unique to neutral inversions. However, when the effective population size is small, the weakened  
428 benefit for new inversion of being initially free of deleterious mutations can result in a peak fixation  
429 probability for intermediately sized inversions (Fig. 5A, where  $N_Y = 10^2$ ).

430 For unconditionally beneficial inversions, taking  $\Pr(\text{SDR} | x)$  into account results in intermediately  
431 sized inversions having the highest fixation probability (Fig. 5B,E). When the SDR is located closer to  
432 either the centromere or telomere, smaller inversions have the highest fixation probability, although a  
433 second peak appears for very large inversions under lower deleterious mutation rates for (Fig. 5E, grey  
434 points).

435 For inversions spanning both the SDR and an SA locus, the relation between inversion size and fixation  
436 probability are robust to the location of the SDR (Fig. 5C,F). The only qualitative difference arises when  
437 the SA locus is initially linked with the SDR, where the fixation probability now has an intermediate  
438 peak associated with slightly smaller inversions than when the SA locus is initially unlinked with the  
439 SDR. Notably, when the SDR is located in the middle of the chromosome arm, the relation between  
440 inversion size and fixation probability is very similar for beneficial inversions and those capturing an SA  
441 locus (compare Fig. 5B with C,F). The two scenarios differ most when the SDR is near the end of the  
442 chromosome arm and the deleterious mutation rate is high, but otherwise it will likely be difficult to  
443 distinguish between these two selection scenarios from the length of evolutionary strata.

444 *Key result: When explicitly taking into account the probability that new inversions span the ancestral SDR, the*  
445 *physical location of the SDR strongly influences the resulting fixation probabilities of different length inversions.*  
446 *Large inversions are only favoured under the neutral scenario, while small to intermediate length inversions are*  
447 *favoured when inversions are either beneficial, or if they capture sexually antagonistic loci.*

## 448 **Expected length distributions of evolutionary strata**

449 With expressions for the fixation probability of new inversions under different evolutionary scenarios in  
450 hand, it is possible to derive the corresponding expected distributions of fixed inversion sizes. Following  
451 Van Valen and Levins (1968); Santos (1986), and Connallon and Olito (2020), the proportion of fixed  
452 inversions of length  $x$  is given by

$$g(x) = \frac{\Pr(\text{fix} | x)f(x)}{\int \Pr(\text{fix} | x)f(x) dx} \quad (17)$$

453 where  $f(x)$  is the probability of a new inversion of length  $x$ , and  $\Pr(\text{fix} | x)$  is the fixation probability  
454 given in Eq(1) with appropriate substitutions made for each selection scenario.  $x \int \Pr(\text{fix} | x)f(x) dx$  gives  
455 the mean length of fixed inversions. Little is known about how the mutational process for new inversions  
456 shapes  $f(x)$ , and we therefore examine two scenarios representing plausible extremes to illustrate the

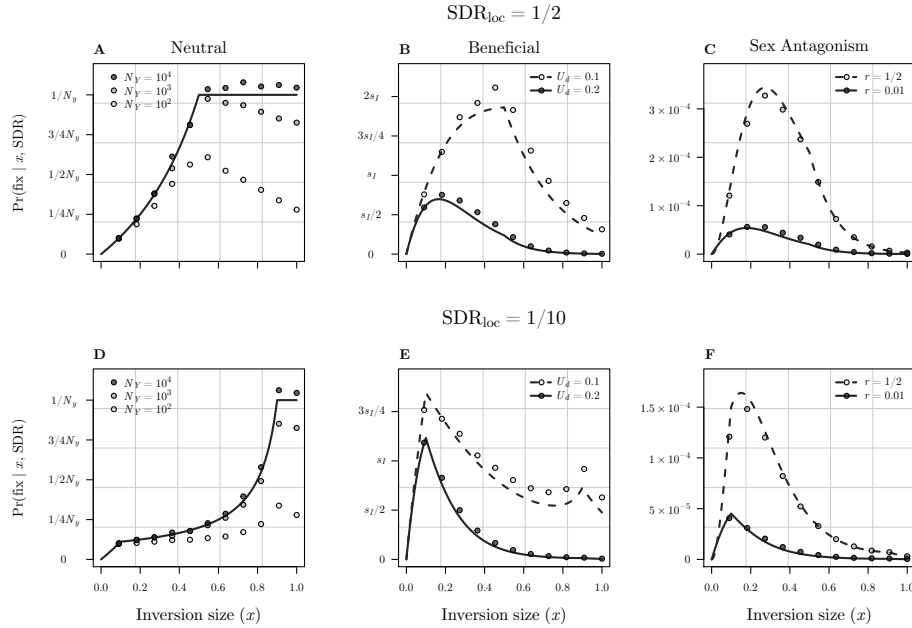

Figure 5: Taking into account the location of the ancestral SDR, and its effect on the fixation probability of inversions of different length. Each panel shows the overall fixation probability of new inversions of length  $x$ , reevaluated with Eq(16) substituted into Eq(1) for each selection scenario. Panels A–C show results when the SDR is located in the exact middle of the chromosome arm ( $SDR_{loc} = 1/2$ ) for neutral inversions, beneficial inversions, and inversions capturing a sexually antagonistic locus; panels D–E show the same when the SDR is located near either the centromere or telomere ( $SDR_{loc} = 1/10$ ). Solid and dashed lines show the relevant analytic approximations of  $\Pr(\text{fix} | x)$ , while points show results for Wright-Fisher simulations. Note that analytic approximations for all three effective population sizes overlap in panel A. Results are shown for the same parameter values as in Fig(2): (A,D)  $U_d = 0.2$  and  $s_d = 0.02$ ; (B,E)  $s_I = 0.02$ ,  $s_d = 0.02$ ; (C,F)  $s_f = s_m = 0.05$ ,  $U_d = 0.1$ ,  $s_d = 0.01$ ,  $A = 1$ ,  $P = 0.05$ .



457 spectrum of possible outcomes.

458 On one hand, if inversion breakpoints are distributed uniformly across the chromosome arm contain-  
459 ing the SDR, then  $f(x) = 2(1 - x)$ , an extreme scenario we refer to as the "random breakpoint" model  
460 (Van Valen and Levins 1968). On the other hand, if inversion breakpoints tend to be clustered, for example  
461 in chromosomal regions with repetitive sequences, the resulting enrichment of smaller new inversions can  
462 be modeled phenomenologically using a truncated exponential distribution:

$$f(x) = \frac{\lambda e^{-\lambda x}}{1 - e^{-\lambda}}, \quad (18)$$

463 where  $\lambda$  is the exponential rate parameter (Pevzner and Tesler 2003; Peng *et al.* 2006; Cheng and Kirk-  
464 patrick 2019; Connallon and Olito 2020). For strongly skewed distributions (e.g.,  $\lambda > 10$ , as we assume  
465 here), the truncation effect is negligible, and  $f(x)$  is approximately equal to the numerator of Eq(18).  
466 We refer to this other extreme as the "exponential model". Two key results emerge from the expected  
467 distributions of evolutionary strata length.

468 First, the results are again strongly influenced by the location of the SDR. When the SDR is located in  
469 the center of the chromosome arm, neutral inversions are expected to give rise to a triangular distribution  
470 of evolutionary strata lengths, with a mean at  $x = 1/2$  (Fig.6A). Both beneficial inversions and those cap-  
471 turing SA loci yield largely overlapping distributions of smaller inversions, although the distribution for  
472 sex antagonism has a distinctly heavier tail under the random breakpoint model. The differences between  
473 the distributions for neutral and selected inversions becomes exaggerated when the SDR is located near  
474 one end of the chromosome arm (Fig.6C). The distribution for neutral inversions now has three distinct  
475 regions yielding a plateau shape, while those for beneficial and sex antagonistic inversions become increas-  
476 ingly skewed and overlapping. The unusual form of the length distributions for neutral inversions under  
477 the random breakpoint model results from the appearance of  $(1 - x)$  terms in both  $f(x)$  and  $\Pr(\text{SDR} | x)$ ,  
478 which cancel in different ranges of  $x$  depending on the location of the SDR.

479 Second, the expected length distributions of evolutionary strata are sensitive to the form of  $f(x)$ .  
480 In contrast to the random breakpoints model, when inversion breakpoints are clustered the predicted  
481 distributions of strata length are highly overlapping for all three selection scenarios, and are practically  
482 indistinguishable when the SDR is located near the end of the chromosome arm (Fig. 6B,D).

483 *Key result: Two dominant factors influence the expected length distribution of fixed inversions expanding the SDR:*  
484 *the location of the ancestral SDR on the chromosome arm, and the length distribution of new inversions. While*  
485 *different selection scenarios are expected to result in distinct distributions under a random breakpoint model, the*  
486 *length distributions become practically indistinguishable under an exponential model of new inversion lengths.*

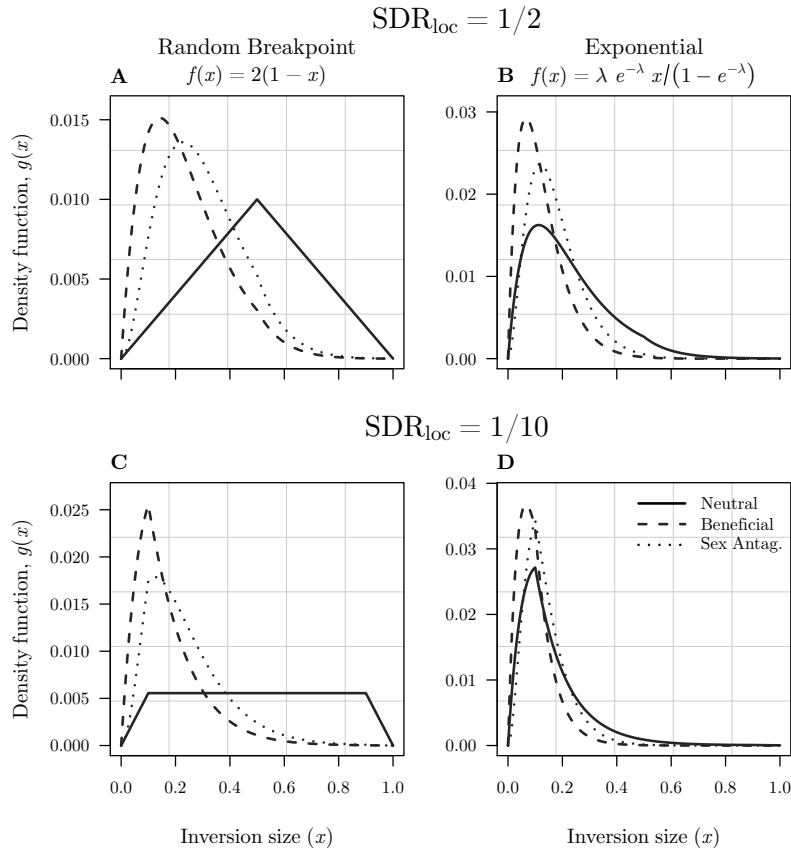

Figure 6: Probability density functions for fixed inversions expanding the SDR on Y chromosomes ( $g(x)$  from Eq[17]). For clarity, we show results for the model of Sexual Antagonism with an initially unlinked SA locus ( $r = 1/2$ ). Results are shown for the same parameter values as in Fig. 2 and Fig. 5:  $U_d = 0.2$ ,  $s_d = 0.02$ , and  $s_I = 0.02$  for Neutral and Beneficial inversion scenarios, and  $s_f = s_m = 0.05$ ,  $U_d = 0.1$ ,  $s_d = 0.01$ ,  $A = 1$  for the Sex Antagonism scenario.

## 487 Discussion

488 Our models reveal two major implications for the evolution of recombination suppression between sex  
489 chromosomes. The first is that different selection scenarios should result in unique associations between  
490 inversion length and fixation probability, suggesting that the length of evolutionary strata may reflect the  
491 selective process underlying expansion of the non-recombining SDR. Specifically, our models predict that  
492 evolutionary strata formed by the fixation of neutral inversions should be significantly larger, on average,  
493 than those formed by directly or indirectly beneficial inversions. However, the most popular hypothesis for  
494 the evolution of suppressed recombination, sexually antagonistic selection, will likely be indistinguishable  
495 from scenarios involving either direct or indirect selection based on the size of evolutionary strata.

496 One obvious application of our findings is to compare the lengths of early evolutionary strata (i.e.,  
497 those occurring when the ancestral SDR is still quite small) identified from DNA sequence data with the  
498 expected length distributions we have derived here. The ongoing development of whole-genome sequenc-  
499 ing technology and analyses is making the identification of genome structural variation, including fixed  
500 inversions and evolutionary strata on sex chromosomes, increasingly feasible for non-model organisms  
501 (reviewed in Muyle *et al.* 2017; Charlesworth 2018; Pandey and Azad 2016). Sex-linked regions have been  
502 identified in a variety of unrelated species with still- or recently-recombining sex chromosomes, including  
503 Papaya (Caricaceae) and two closely related species (Wang *et al.* 2012; Lovene *et al.* 2015), *Mercurialis an-*  
504 *nua* (Veltos *et al.* 2019), the genus *Populus* (Salicaceae) (reviewed in Hobza *et al.* 2018), and several fishes  
505 including African cichlids (Gammerdinger and Kocher 2018) and yellowtail (Koyama *et al.* 2015). More-  
506 over, inversions appear to be involved in the evolution of sex-linked genome regions in several of these  
507 species (but see recent work on *Salix*; Almeida *et al.* 2019). Our findings suggest inversion lengths may  
508 inform how, or whether, selection affected the fixation of inversions (or other recombination modifiers)  
509 in systems like these, however such comparisons will never be definitively diagnostic. Clearly it is not  
510 possible to observe a distribution of evolutionary strata lengths for single species. Moreover, subsequent  
511 sequence evolution within a newly expanded SDR, including deletions, duplications, and the accumula-  
512 tion of transposable elements will distort comparisons. Nevertheless, the observed length of relatively  
513 undegraded evolutionary strata should often provide different levels of support for neutral vs. selection  
514 scenarios: large evolutionary strata are more consistent with the fixation of a neutral inversion (or other  
515 linked large-effect recombination modifier), while small strata (possibly including gene-by-gene recom-  
516 bination suppression or gradual expansion of the SDR; e.g., Bergero *et al.* 2013; Qiu *et al.* 2015), is more  
517 consistent with scenarios involving selection.

518 The second major implication of our models is that physical characteristics of recombining sex chro-  
519 mosomes, including the location of the ancestral SDR, can have a stronger effect than selection on the

520 evolution of suppressed recombination. This is a crucial difference between the process of recombination  
521 suppression on sex chromosomes, and the fixation of inversions on autosomes, for which the interaction  
522 between deleterious genetic variation and the form of natural selection is critical (Connallon and Olito  
523 2020). The effect of SDR location on the likelihood of forming different sized evolutionary strata emerges  
524 directly from the geometry of a functionally two dimensional chromosome arm and our assumption that  
525 inversion breakpoints are distributed uniformly along it. Although these are clearly major simplifying as-  
526 sumptions, the resulting predictions suggest that considering physical characteristics of recombining sex  
527 chromosomes could shed light on several outstanding questions (reviewed in Charlesworth 2016, 2017),  
528 such as why large sex-linked regions or heteromorphic sex chromosomes have evolved in some lineages  
529 and not others, and how many recombination suppression events are involved and why this varies among  
530 lineages? Overall, our models suggest that considering the physical processes involved in recombination  
531 suppression may offer additional insights into why and how restricted recombination does or does not  
532 evolve in different lineages than seeking evidence of past bouts of sexually antagonistic selection.

533 Although we have modelled the effect of SDR location explicitly, other physical characteristics of re-  
534 combining sex chromosomes not included in our models also influence the process of recombination  
535 suppression. For example, it is well known that the rate of recombination at different locations along  
536 chromosomes – the ‘recombination landscape’ – can be highly variable within and among species, and  
537 that marked differences often exist between males and females (reviewed in Singhal *et al.* 2015; Sardell  
538 and Kirkpatrick 2020). It has also been suggested that new sex determining genes may be more likely to  
539 recruit to genome regions with already low recombination rates (Charlesworth and Charlesworth 1978a;  
540 van Doorn and Kirkpatrick 2007, 2010; Scott *et al.* 2018; Charlesworth 2015; Olito and Connallon 2019). For  
541 example, this appears to be the case for *Rumex hastatulus* and Papaya relatives (Rifkin *et al.* 2020; Lovene  
542 *et al.* 2015). Moreover, classical theory predicts that low recombination rates are favourable for the main-  
543 tenance of sexually antagonistic polymorphism (Charlesworth and Charlesworth 1978a; Olito 2017; Olito  
544 and Connallon 2019; Charlesworth 2018). If these regions of low recombination are more likely to occur at  
545 certain locations along the chromosome arm, the possible locations of the SDR may be constrained, thereby  
546 influencing whether further recombination suppression will involve small vs. large evolutionary strata.  
547 Given that recombination is often lower in genome regions surrounding the centromere (e.g., Mahtani  
548 and Willard 1998; Sardell and Kirkpatrick 2020), it would be interesting to examine how our predictions,  
549 which are limited to paracentric inversions, might change when inversions suppressing recombination are  
550 pericentric.

551 There is perhaps a parallel between the evolution of divergence between sex chromosomes parallels the  
552 genomics of speciation. Early genomic analysis of hybrid species pairs suggested the existence of "genomic  
553 islands of speciation" – restricted regions with high genetic differentiation between species – which were

554 speculated to contribute to adaptation and reproductive isolation (e.g., Ellegren *et al.* 2012). Although  
555 apparent genomic islands of divergence have been identified (Tavares *et al.* 2018), a number of early  
556 analyses were later shown to provide inadequate control for confounding factors such as variable levels  
557 of genetic diversity across the genome or variation in recombination rate (Noor and Bennett 2009; Wolf  
558 and Ellegren 2017). Consequently, regions of high divergence were often erroneously ascribed to selection  
559 rather than neutral or structural factors. Both this example and the results of our models suggest that  
560 caution is warranted when inferring causation with respect to genomic differentiation, and that selective  
561 explanations, although intuitively appealing, may not always be the most parsimonious.

562 Finally, our results show that the shape of the distribution of new inversion lengths (e.g., random  
563 breakpoint vs. exponential) can weaken or exaggerate differences between selection scenarios in the ex-  
564 pected length distributions of evolutionary strata. Although little is known about the distribution of new  
565 inversion lengths (limited data from *Drosophila* mutagenesis experiments are roughly consistent with a  
566 random breakpoint model; Krimbas and Powell 1992), it will be determined, at least in part, by other  
567 physical aspects of proto sex chromosome structure, such as the density and physical location of gene du-  
568 plications, chromatin structure, transposable elements (TEs) and other repetitive sequences, which create  
569 hotspots for inversion breakpoints and DNA replication errors (e.g., Charlesworth *et al.* 1994; Pevzner and  
570 Tesler 2003; Peng *et al.* 2006; Lee *et al.* 2008). Indeed, the spatial distribution of these structural features of  
571 sex chromosomes will contribute jointly to determine the whether and how expanded non-recombining  
572 regions on sex chromosomes evolve. The interaction between physical and selective processes driving the  
573 evolution of recombination suppression between sex chromosomes offers a variety of future directions for  
574 theoretical and empirical research.

## 575 **Acknowledgements**

576 This research was supported by a Wenner-Gren Postdoctoral Fellowship to C.O., and ERC-StG-2015-678148  
577 to J.K.A. This manuscript benefitted greatly from many detailed discussions and constructive feedback  
578 from T. Connallon, C.Y. Jordan, C. Venables, H. Papoli, the SexGen group at Lund University, the editor,  
579 and two anonymous reviewers. C.O. conceived the study, developed the models, performed the analyses.  
580 Both C.O. and J.K.A. wrote the manuscript.

## 581 **Supplementary Materials**

582 Requests for supplementary material and correspondence can be directed to C.O. (colin.olito@gmail.  
583 com).

## 584 Literature Cited

- 585 Agrawal, A. F. and M. C. Whitlock, 2012 Mutation load: the fitness of individuals in populations where  
586 deleterious alleles are abundant. *Ann. Rev. Ecol. Evol. Syst.* **43**: 115–135.
- 587 Almeida, P., E. Proux-Wera, A. Churcher, L. Soler, J. Dainat, *et al.*, 2019 Single-molecule genome assembly  
588 of the basket willow, *salix viminalis*, reveals earliest stages of sex chromosome expansion. bioRxiv **doi:**  
589 <https://doi.org/10.1101/589804>: 1–40.
- 590 Bachtrog, D., 2008 The temporal dynamics of processes underlying y chromosome degeneration. *Genetics*  
591 **179**: 1513–1525.
- 592 Bergero, Q. S., Roberta, A. Forrest, H. Borthwick, and D. Charlesworth, 2013 Expansion of the pseudo-  
593 autosomal region and ongoing recombination suppression in the *silene latifolia* sex chromosomes. *Ge-*  
594 *netics* **194**: 673–686.
- 595 Bergero, R. and D. Charlesworth, 2009 The evolution of restricted recombination in sex chromosomes.  
596 *Trends in Ecology and Evolution* **24**: 94–102.
- 597 Bergero, R., J. Gardner, B. Bader, L. Yong, and D. Charlesworth, 2019 Exaggerated heterochiasmy in a fish  
598 with sex-linked male coloration polymorphisms. *PNAS* **116**: 6924–6931.
- 599 Beukeboom, L. W. and N. Perrin, 2014 5, pp. 90–95 in *The evolution of sex determination*, Oxford University  
600 Press.
- 601 Bull, J. J., 1983 *Evolution of sex determining systems*. The Benjamin/Cummings Publishing Company, Cali-  
602 fornia, USA.
- 603 Charlesworth, B. and D. Charlesworth, 1978a A model for the evolution of dioecy and gynodioecy. *Amer-*  
604 *ican Naturalist* **112**: 975–997.
- 605 Charlesworth, B. and D. Charlesworth, 2000 The degeneration of y chromosomes. *Phil. Trans. Roy. Soc. B*  
606 **355**: 1563–1572.
- 607 Charlesworth, B., P. Sniegowski, and W. Stephan, 1994 The evolutionary dynamics of repetitive dna in  
608 eukaryotes. *Nature* **371**: 215–220.
- 609 Charlesworth, D., 2015 Plant contributions to our understanding of sex chromosome evolution. *New*  
610 *Phytologist* **208**: 52–65.
- 611 Charlesworth, D., 2016 Plant sex chromosomes. *Ann. Rev. Plant Biol.* **67**: 397–420.
- 612 Charlesworth, D., 2017 Evolution of recombination rates between sex chromosomes. *Phil. Trans. Roy. Soc. B*  
613 **372**: 20160456.
- 614 Charlesworth, D., 2018 Young sex chromosomes in plants and animals. *New Phytologist* **224**: 1095–1107.
- 615 Charlesworth, D. and B. Charlesworth, 1978b Population genetics of partial male-sterility and the evolution  
616 of monoecy and dioecy. *Heredity* **41**: 137–153.

- 617 Charlesworth, D. and B. Charlesworth, 1980 Sex differences in fitness and selection for centric fusions  
618 between sex-chromosomes and autosomes. *Genetical Research* **35**: 205–214.
- 619 Charlesworth, D., B. Charlesworth, and G. Marais, 2005 Steps in the evolution of heteromorphic sex  
620 chromosomes. *Heredity* **95**: 118–128.
- 621 Cheng, C. and M. Kirkpatrick, 2019 Inversions are bigger on the x chromosome. *Molecular Ecology* **28**:  
622 1238–1245.
- 623 Chippindale, A. K., J. R. Gibson, and W. R. Rice, 2001 Negative genetic correlation for adult fitness between  
624 sexes reveals ontogenetic conflict in *drosophila*. *PNAS* **98**: 1671–1675.
- 625 Connallon, T. and C. Olito, 2020 Impact of chromosomal inversion length on fixation probability. *Mol. Ecol.*  
626 p. In Review.
- 627 Connallon, T., C. Olito, L. Dutoit, H. Papoli, F. Ruzicka, *et al.*, 2018 Local adaptation and the evolution of  
628 inversions on sex chromosomes and autosomes. *Phil. Trans. Roy. Soc. B* **373**: 20170423.
- 629 Crow, J. F. and M. Kimura, editors, 1970 *An introduction to population genetics theory*. New York, Evanston  
630 and London: Harper & Row, Publishers, New York, USA.
- 631 Ellegren, H., L. Smeds, R. Burri, P. I. Olason, Backström, *et al.*, 2012 The genomic landscape of species  
632 divergence in *ficedula* flycatchers. *Nature* **491**: 756–760.
- 633 Fisher, R. A., 1931 The evolution of dominance. *Biological Reviews* **6**: 345–368.
- 634 Fisher, R. A., 1935 The sheltering of lethals. *American Naturalist* **69**: 446–455.
- 635 Gammerdinger, W. J. and T. D. Kocher, 2018 Unusual diversity of sex chromosomes in african cichlid  
636 fishes. *Genes* **9**: 480.
- 637 Gibson, J. R., A. K. Chippindale, and W. R. Rice, 2002 The x chromosome is a hot spot for sexually  
638 antagonistic fitness variation. *Proc. Roy. Soc. B* **269**: 499–505.
- 639 Gillespie, J. H., 1991 *The causes of molecular evolution*. Oxford University Press, New York, USA.
- 640 Haldane, J., 1927 A mathematical theory of natural and artificial selection. v. selection and mutation.  
641 *Proc. Camb. Philos. Soc.* **23**: 838–844.
- 642 Haldane, J., 1937 The effect of variation of fitness. *American Naturalist* **71**: 337–349.
- 643 Haldane, J., 1957 The conditions for coadaptation in polymorphism for inversions. *J. Genetics* **55**: 218–225.
- 644 Handley, L. L., H. Ceplitis, and H. Ellegren, 2004 Evolutionary strata on the chicken z chromosome:  
645 Implications for sex chromosome evolution. *Genetics* **167**: 367–376.
- 646 Hobza, R., V. Hudzieczek, Z. Kubat, R. Cegan, B. Vyskot, *et al.*, 2018 Sex and the flower – developmental  
647 aspects of sex chromosome evolution. *Ann. Bot.* **122**: 1085–1101.
- 648 Immler, S., G. Arnqvist, and S. P. Otto, 2011 Ploidally antagonistic selection maintains stable genetic  
649 polymorphism. *Evolution* **66**: 55–65.
- 650 Ironside, J. E., 2010 No amicable divorce? challenging the notion that sexual antagonism drives sex



- 651 chromosome evolution. *Bioessays* **32**: 718–726.
- 652 Kidwell, J. F., M. T. Clegg, F. M. Stewart, and T. Prout, 1977 Regions of stable equilibria for models of  
653 selection in the two sexes under random mating. *Genetics* **85**: 171–183.
- 654 Kimura, M., 1962 On the probability of fixation of mutant genes in a population. *Genetics* **47**: 713–719.
- 655 Kimura, M. and T. Ohta, 1970 Probability of fixation of a mutant gene in a finite population when selective  
656 advantage decreases with time. *Genetics* **65**: 525–534.
- 657 Kirkpatrick, M. and N. Barton, 2003 Chromosome inversions, local adaptation and speciation. *Genetics*  
658 **173**: 419–434.
- 659 Kirkpatrick, M. and R. F. Guerrero, 2014 Signatures of sex-antagonistic selection on recombining sex  
660 chromosomes. *Genetics* **197**: 531–541.
- 661 Kirkpatrick, M. and S. Peischl, 2013 Evolutionary rescue by beneficial mutations in environments that  
662 change in space and time. *Phil. Trans. Roy. Soc. B* **368**: 20120082.
- 663 Korunes, K. L. and M. A. F. Noor, 2019 Pervasive gene conversion in chromosomal inversion heterozygotes.  
664 *Molecular Ecology* **28**: 1302–1315.
- 665 Koyama, T., A. Ozaki, K. Yoshida, J. Suzuki, K. Fuji, *et al.*, 2015 Identification of sex-linked snps and  
666 sex-determining regions in the yellowtail genome. *Mar. Biotechnol.* **17**: 502–510.
- 667 Krimbas, C. B. and J. R. Powell, editors, 1992 *Drosophila inversion polymorphism*. CRC Press, Florida, USA.
- 668 Lahn, B. T. and D. C. Page, 1999 Four evolutionary strata on the human x chromosome. *Science* **286**:  
669 964–967.
- 670 Lee, J., K. Han, T. J. Meyer, H.-S. Kim, and M. A. Batzer, 2008 Chromosomal inversions between human  
671 and chimpanzee lineages caused by retrotransposons. *PLoS One* **3**: e4047.
- 672 Lenormand, T., 2003 The evolution of sex dimorphism in recombination. *Genetics* **163**: 811–822.
- 673 Lovene, M., Q. Yu, R. Ming, and J. Jiang, 2015 Evidence for emergence of sex-determining gene(s) in a  
674 centromeric region in *vasconcella parviflora*. *Genetics* **199**: 413–421.
- 675 Mahtani, M. M. and H. F. Willard, 1998 Physical and genetic mapping of the human x chromosome  
676 centromere: repression of recombination. *Genome Research* **8**: 100–110.
- 677 Muralidhar, P. and C. Veller, 2018 Sexual antagonism and the instability of environmental sex determina-  
678 tion. *Nature Ecology & Evolution* **2**: 343–351.
- 679 Muyle, A., R. Shearn, and G. A. B. Marais, 2017 Evolution of sex chromosomes and dosage compensation  
680 in plants. *GBE* **9**: 627–645.
- 681 Nei, M., 1969 Linkage modification and sex difference in recombination. *Genetics* **63**: 681–699.
- 682 Nei, M., K.-I. Kojima, and H. E. Schaffer, 1967 Frequency changes of new inversions in populations under  
683 mutation-selection equilibria. *Genetics* **57**: 741–750.
- 684 Noor, M. A. F. and S. M. Bennett, 2009 Islands of speciation or mirages in the desert? examining the role

- 685 of restricted recombination in maintaining species. *Heredity* **103**: 439–444.
- 686 Ohta, T. and K.-I. Kojima, 1968 Survival probabilities of new inversions in large populations. *Biometrics*  
687 **24**: 501–516.
- 688 Olito, C., 2017 Consequences of genetic linkage for the maintenance of sexually antagonistic polymor-  
689 phism in hermaphrodites. *Evolution* **71**: 458–464.
- 690 Olito, C. and T. Connallon, 2019 Sexually antagonistic variation and the evolution of dimorphic sexual  
691 systems. *American Naturalist* **193**: 688–701.
- 692 Olito, C., B. Hansson, S. Ponnikas, and J. K. Abbott, 2020 On the sheltering of deleterious mutations on  
693 recombining sex chromosomes. in prep pp. –.
- 694 Orr, H. A. and Y. Kim, 1998 An adaptive hypothesis for the evolution of the y chromosome. *Genetics* **150**:  
695 1693–1698.
- 696 Otto, S. P., 2019 Evolutionary potential for genomic islands of sexual divergence on recombining sex  
697 chromosomes. *New Phytologist* **224**: 1241–1251.
- 698 Otto, S. P., J. R. Pannell, C. L. Peichel, T.-L. Ashman, D. Charlesworth, *et al.*, 2011 About par: The distinct  
699 evolutionary dynamics of the pseudoautosomal region. *Trends in Genetics* **27**: 358–367.
- 700 Pandey, R. S. and R. K. Azad, 2016 Deciphering evolutionary strata on plant sex chromosomes and fungal  
701 mating-type chromosomes through compositional segmentation. *Plant Mol. Biol.* **90**: 359–373.
- 702 Peischl, S. and M. Kirkpatrick, 2012 Establishment of new mutations in changing environments. *Genetics*  
703 **191**: 895–906.
- 704 Peng, Q., P. A. Pevzner, and G. Tesler, 2006 The fragile breakage versus random breakage models of  
705 chromosome evolution. *PLoS Comput. Biol.* **2**: 100–111.
- 706 Pevzner, P. A. and G. Tesler, 2003 Human and mouse genomic sequences reveal extensive breakpoint reuse  
707 in mammalian evolution. *PNAS* **100**: 7672–7677.
- 708 Ponnikas, S., H. Sigeman, J. K. Abbott, and B. Hansson, 2018 Why do sex chromosomes stop recombining?  
709 *Trends in Genetics* **34**: 492–503.
- 710 Qiu, S., R. Bergero, and D. Charlesworth, 2013 Testing for the footprint of sexually antagonistic polymor-  
711 phisms in the pseudoautosomal region of a plant sex chromosome pair. *Genetics* **194**: 663–672.
- 712 Qiu, S., R. Bergero, S. Guirao-Rico, J. Campos, T. Cezard, *et al.*, 2015 Rad mapping reveals an evolving,  
713 polymorphic and fuzzy boundary of a plant pseudoautosomal region. *Molecular Ecology* **25**: 414–430.
- 714 R Core Team, 2018 *R: A Language and Environment for Statistical Computing*. R Foundation for Statistical  
715 Computing, Vienna, Austria.
- 716 Rice, W. R., 1984 Sex chromosomes and the evolution of sexual dimorphism. *Evolution* **38**: 735–742.
- 717 Rice, W. R., 1987 The accumulation of sexually antagonistic genes as a selective agent promoting the  
718 evolution of reduced recombination between primitive sex chromosomes. *Evolution* **41**: 911–914.

- 719 Rice, W. R., 1992 Sexually antagonistic genes: experimental evidence. *Science* **256**: 1436–1439.
- 720 Rice, W. R., 1996 Evolution of the y sex chromosome in animals. *BioScience* **46**: 331–343.
- 721 Rifkin, J. L., F. E. G. Beaudry, Z. Humphries, B. I. Choudhury, S. C. H. Barrett, *et al.*,  
722 2020 Widespread recombination suppression facilitates plant sex chromosome evolution. bioRxiv  
723 <https://doi.org/10.1101/2020.02.07.937490>: 1–26.
- 724 Roe, K., 1975 Origin of the alternation of generations in plants: reconsideration of the traditional theories.  
725 *Biologist* **57**: 1–13.
- 726 Santos, M., 1986 The role of genic selection in the establishment of inversion polymorphism in *drosophila*  
727 *subobscura*. *Genetica* **69**: 35–45.
- 728 Sardell, J. M. and M. Kirkpatrick, 2020 Sex differences in the recombination landscape. *American Natural-*  
729 *ist* **195**: 361–379.
- 730 Scott, M. F., M. M. Osmond, and S. P. Otto, 2018 Haploid selection, sex ratio bias, and transitions between  
731 sex-determining systems. *PLoS Biology* **16**: e2005609.
- 732 Singhal, S., E. M. Leffler, K. Sannareddy, O. Turner, Isaac Venn, D. M. Hooper, *et al.*, 2015 Stable recombi-  
733 nation hotspots in birds. *Science* **350**: 928–932.
- 734 Strasburger, E., 1894 The periodic reduction of the number of the chromosomes in the life-history of living  
735 organisms. *Annals of Botany* **8**: 281–316.
- 736 Tavares, H., A. Whibley, D. L. Field, D. Bradley, M. Couchman, *et al.*, 2018 Selection and gene flow shape  
737 genomic islands that control floral guides. *PNAS* **115**: 11006–11011.
- 738 Úbeda, F., D. Haig, and M. Patten, 2010 Stable linkage disequilibrium owing to sexual antagonism.  
739 *Proc. Roy. Soc. B* pp. 1–8.
- 740 Uecker, H. and J. Hermisson, 2011 On the fixation process of a beneficial mutation in a variable environ-  
741 ment. *Genetics* **188**: 915–930.
- 742 van Doorn, G. S. and M. Kirkpatrick, 2007 Turnover of sex chromosomes induced by sexual conflict.  
743 *Nature* **449**: 909–912.
- 744 van Doorn, G. S. and M. Kirkpatrick, 2010 Transitions between male and female heterogamety caused by  
745 sex-antagonistic selection. *Genetics* **186**: 629–645.
- 746 Van Valen, L. and R. Levins, 1968 The origins of inversion polymorphisms. *American Naturalist* **923**: 5–24.
- 747 Veltsos, P., K. E. Redout, M. A. Toups, G. a. lez Mart í nez, A. Muyle, *et al.*, 2019 Early sex-chromosome  
748 evolution in the diploid dioecious plant *mercurialis annua*. *Genetics* **212**: 815–835.
- 749 Wang, J., J.-K. Na, Q. Yu, A. R. Gschwend, J. Han, *et al.*, 2012 Sequencing papaya x and y<sup>h</sup> chromosomes  
750 reveals molecular basis of incipient sex chromosome evolution. *PNAS* **109**: 13710–13715.
- 751 Waxman, D., 2011 A unified treatment of the probability of fixation when population size and the strength  
752 of selection change over time. *Genetics* **188**: 907–913.

- 753 Wellenreuther, M. and L. Bernatchez, 2018 Eco-evolutionary genomics of chromosomal inversions. Trends  
754 in Ecology and Evolution **33**: 427–440.
- 755 Wolf, J. B. W. and H. Ellegren, 2017 Making sense of genomic islands of differentiation in light of specia-  
756 tion. Nature Reviews Genetics **18**: 87–100.
- 757 Wright, A. E., I. Darolti, N. I. Bloch, V. Oostra, B. Sandkam, *et al.*, 2017 Convergent recombination suppres-  
758 sion suggests role of sexual selection in guppy sex chromosome formation. Nature Communications **8**:  
759 14251.
- 760 Zhou, Q. and D. Bachtrog, 2012 Sex-specific adaptation drives early sex chromosome evolution in  
761 *drosophila*. Science **337**: 341–345.

Table 1: **Definition of terms and parameters.**

| <i>Key terms</i>                       |                                                                                                                                                                               |
|----------------------------------------|-------------------------------------------------------------------------------------------------------------------------------------------------------------------------------|
| $x$                                    | Inversion size, expressed as fraction of the chromosome that it spans ( $0 < x < 1$ ).                                                                                        |
| $N, N_f, N_m$                          | Census, and breeding male and female population sizes, respectively.                                                                                                          |
| $N_Y, N_X,$                            | Effective population size for Y- and X-linked genes, respectively.                                                                                                            |
| $s_I$                                  | Overall fitness effect for a new inversion ( $0 < s \ll 1$ ).                                                                                                                 |
| $s_i$                                  | Sex specific selection coefficient for selected loci in diploid phase ( $i \in \{s, f\}$ ).                                                                                   |
| $h_i$                                  | Sex specific dominance coefficient for selected loci in diploid phase ( $i \in \{s, f\}$ ).                                                                                   |
| $t_i$                                  | Sex specific selection coefficient selected loci in haploid phase ( $i \in \{s, f\}$ ).                                                                                       |
| $n$                                    | Number of selected loci captured by new inversion                                                                                                                             |
| $k$                                    | Number of deleterious mutations captured by new inversion                                                                                                                     |
| $A$                                    | Expected number of sexually antagonistic loci on sex chromosomes                                                                                                              |
| $P$                                    | Length of <i>sl</i> -PAR, expressed as fraction of total chromosome length                                                                                                    |
| $\lambda$                              | Rate parameter for the exponential model of new inversion lengths; $\lambda^{-1}$ is the average length of a new inversion under the exponential model.                       |
| $U_d$                                  | Chromosome-wide deleterious mutation rate ( $0 < U_d$ )                                                                                                                       |
| $s_d$                                  | Selection coefficient for deleterious mutations ( $0 < s_d \ll 1$ ).                                                                                                          |
| $h_d$                                  | Dominance coefficient for deleterious mutations ( $0 \leq h_d \leq 1$ ; often approximated as $h_d \approx 1/2$ ).                                                            |
| <i>Deterministic 2-locus models</i>    |                                                                                                                                                                               |
| $w_{ii}^f, w_{ii}^m$                   | diploid fitness terms for each genotype in females and males                                                                                                                  |
| $v_i^f, v_i^m$                         | haploid fitness terms for each genotype in female and male gametes                                                                                                            |
| $r$                                    | Recombination rate between SDR and selected locus                                                                                                                             |
| $\lambda_I$                            | Leading eigenvalue associated with invasion of rare inversion genotype                                                                                                        |
| $\hat{q}$                              | Equilibrium frequency of male-beneficial sexually antagonistic allele (when $r = 1/2$ )                                                                                       |
| $X_f, X_m, Y$                          | Equilibrium frequency of male-beneficial sexually antagonistic allele on X chromosomes in males and females, and Y chromosomes, respectively.                                 |
| <i>Probability inversion spans SDR</i> |                                                                                                                                                                               |
| $SDR_{loc}$                            | Location of the SDR on the chromosome arm, expressed as a proportion of the distance between the centromere and telomere ( $0 \leq SDR_{loc} \leq 1$ ).                       |
| $y_1, y_2, y_3$                        | Proportion of total length of the chromosome arm that falls between the centromere and SDR, between the SDR and the telomere, and spanned by the ancestral SDR, respectively. |

**Table 2: Fitness expressions for models of Indirect Selection.**

| <i>Sexually antagonistic selection</i>  |                               |                                 |                            |
|-----------------------------------------|-------------------------------|---------------------------------|----------------------------|
| Females:                                | $w_{11}^f = 1$                | $w_{12}^f = 1 - h_f s_f$        | $w_{22}^f = 1 - s_f$       |
| Males:                                  | $w_{11}^m = 1 - s_m$          | $w_{12}^m = 1 - h_m s_m$        | $w_{22}^m = 1$             |
| <i>Ploidally-antagonistic selection</i> |                               |                                 |                            |
| Diploid:                                | $w_{11}^{\text{sex}} = 1 - s$ | $w_{12}^{\text{sex}} = 1 - s/2$ | $w_{22}^{\text{sex}} = 1$  |
| Haploid:                                | $v_1^{\text{sex}} = 1$        | -                               | $v_2^{\text{sex}} = 1 - t$ |

Where  $\text{sex} \in \{m, f\}$ .
